# Supplementary material
Source: Springer Nature journal article supplement (https://www.springermedizin.de/resource/supplementary/12958_2011_977_MOESM2_ESM.pdf/9566476)
Supplement: MOESM2 [file 9566476]

hCG

Fixed Protocol

3 mg

Flexible Protocol

FSH Stimulation 1 2 3 4 5 6 7 8 9 10 11 12
